# Supplementary material for: Wearable strain sensors based on casein-driven tough, adhesive and anti-freezing hydrogels for monitoring human-motion
Source: Royal Society of Chemistry journal article supplement (doi:10.1039/c9tb01340g), 2019-01-01
Supplement: c9tb01340g1.pdf [file c9tb01340g1.pdf]

## Supporting information

### Wearable strain sensors based on casein-driven tough, adhesive and anti-freezing hydrogels for monitoring human-motion

Lin Guan, Su Yan, Xin Liu, Xinyao Li, Guanghui Gao\*

Polymeric and Soft Materials Laboratory, School of Chemical Engineering, and Advanced Institute of Materials Science, Changchun University of Technology, Changchun, 130012, P. R. China

Corresponding authors: Guanghui Gao

E-mail: ghgao@ccut.edu.cn

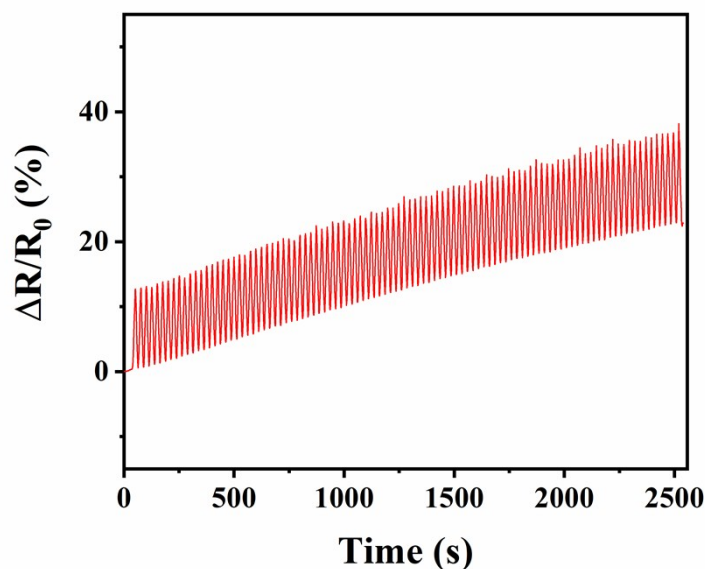

Figure S1. The PAAm/Casein hydrogel sensor at 100% strain for 100 cycles.

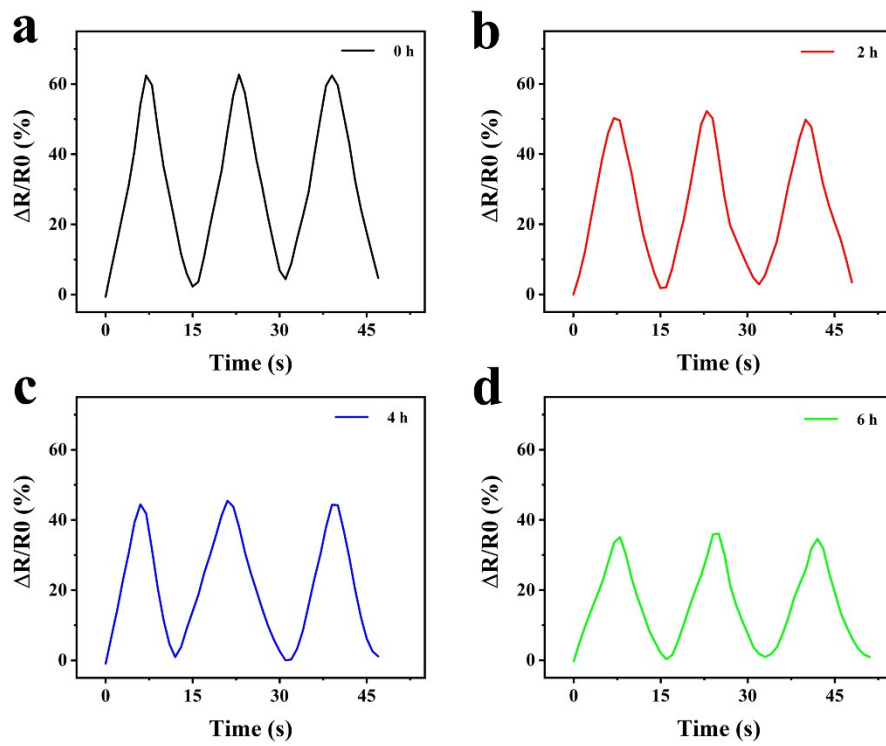

Figure S2. Relative resistance changes of the PAAm/Casein hydrogel sensor as a function of time of water loss: (a) 0 h; (b) 2 h; (c) 4 h; (d) 6 h.
